# Supplementary material
Source: MDPI journal article supplement (https://www.mdpi.com/1424-2818/15/3/448)
Supplement: s1 [file s1]

## Sheet: TableS1
Table S1. Age-depth model data for the peat deposits in the Gorenki mire
Depth, cm	Minimal calibrated age, CE/BCE	Maximal calibrated age, CE/BCE	Median calibrated age, CE/BCE	Mean calibrated age, CE/BCE
Undisturbed deposits
0	2018	2024	2021	2021
1	2003	2021	2016	2015
2	1984	2020	2011	2009
3	1967	2020	2006	2003
4	1949	2019	2000	1997
5	1931	2019	1995	1991
6	1923	2012	1984	1981
7	1917	2008	1972	1971
8	1908	2005	1962	1962
9	1893	2002	1953	1952
10	1872	2000	1943	1942
11	1870	1986	1937	1934
12	1868	1974	1929	1927
13	1866	1966	1920	1919
14	1863	1960	1911	1911
15	1858	1955	1902	1904
16	1857	1939	1895	1896
17	1855	1923	1888	1888
18	1853	1907	1881	1880
19	1850	1892	1874	1873
20	1845	1881	1866	1865
21	1843	1875	1862	1862
22	1842	1869	1859	1858
23	1841	1864	1856	1855
24	1839	1858	1853	1852
25	1837	1853	1849	1849
25	1837	1853	1849	1849
26	1741	1846	1813	1808
27	1634	1842	1778	1767
28	1527	1838	1743	1725
29	1420	1835	1708	1684
30	1312	1831	1673	1643
31	1295	1799	1628	1604
32	1270	1777	1581	1565
33	1226	1764	1538	1525
34	1166	1751	1496	1486
35	1099	1739	1459	1446
36	1076	1688	1418	1407
37	1048	1659	1379	1367
38	1015	1642	1329	1328
39	975	1622	1285	1288
40	913	1608	1242	1248
41	894	1525	1201	1205
42	876	1459	1157	1161
43	852	1421	1110	1117
44	819	1388	1061	1074
45	774	1368	1017	1030
46	762	1276	982	991
47	751	1184	947	952
48	738	1108	911	912
49	719	1048	873	873
50	688	1005	834	834
51	671	969	812	809
52	646	945	788	784
53	597	930	762	760
54	542	917	740	735
55	480	907	718	711
56	459	890	697	689
57	429	872	675	668
58	393	861	654	646
59	350	849	634	625
60	298	838	613	604
61	279	817	592	582
62	254	802	571	561
63	229	786	551	540
64	189	775	530	519
65	147	767	510	497
66	128	747	490	477
67	108	734	471	457
68	76	719	451	437
69	47	708	430	416
70	8	695	409	396
71	-14	676	388	375
72	-34	657	367	355
73	-62	641	347	334
74	-93	629	326	313
75	-126	623	306	293
76	-140	607	285	272
77	-160	583	262	251
78	-186	564	242	230
79	-213	549	219	209
80	-247	540	200	189
81	-264	521	178	168
82	-287	502	157	147
83	-316	486	135	126
84	-342	470	115	105
85	-366	455	93	84
86	-386	430	71	62
87	-408	416	49	40
88	-432	397	27	18
89	-461	383	4	-3
90	-489	370	-16	-25
91	-520	352	-36	-46
92	-540	335	-59	-67
93	-560	320	-81	-88
94	-587	307	-103	-109
95	-614	299	-121	-130
96	-635	275	-141	-151
97	-654	257	-164	-172
98	-676	238	-185	-193
99	-699	227	-208	-214
100	-721	215	-231	-235
101	-749	189	-257	-260
102	-776	163	-284	-286
103	-812	141	-312	-311
104	-833	127	-338	-337
105	-864	108	-360	-363
106	-888	70	-387	-389
107	-910	43	-412	-416
108	-932	16	-440	-443
109	-966	-6	-466	-470
110	-989	-29	-490	-496
111	-1018	-61	-518	-524
112	-1044	-89	-547	-551
113	-1076	-116	-574	-578
114	-1103	-137	-602	-605
115	-1133	-148	-629	-632
116	-1155	-179	-659	-660
117	-1177	-209	-685	-687
118	-1200	-229	-712	-715
119	-1234	-248	-742	-742
120	-1262	-271	-771	-770
121	-1279	-310	-798	-796
122	-1298	-336	-825	-823
123	-1322	-360	-849	-849
124	-1347	-382	-878	-876
125	-1381	-401	-905	-902
126	-1392	-443	-932	-930
127	-1421	-481	-960	-957
128	-1444	-514	-989	-984
129	-1472	-536	-1016	-1011
130	-1494	-561	-1042	-1038
131	-1512	-598	-1069	-1066
132	-1530	-635	-1102	-1093
133	-1555	-655	-1128	-1120
134	-1576	-676	-1156	-1148
135	-1604	-689	-1183	-1175
136	-1622	-733	-1211	-1201
137	-1638	-762	-1237	-1228
138	-1660	-785	-1264	-1254
139	-1682	-825	-1289	-1281
140	-1706	-839	-1316	-1307
141	-1725	-888	-1344	-1334
142	-1746	-918	-1371	-1360
143	-1765	-952	-1400	-1386
144	-1787	-986	-1428	-1412
145	-1821	-1014	-1455	-1439
146	-1829	-1055	-1478	-1465
147	-1845	-1093	-1502	-1492
148	-1862	-1123	-1531	-1518
149	-1878	-1145	-1559	-1545
150	-1906	-1165	-1587	-1571
151	-1923	-1216	-1612	-1598
152	-1943	-1267	-1637	-1625
153	-1966	-1302	-1664	-1652
154	-1987	-1327	-1689	-1679
155	-2010	-1344	-1717	-1706
156	-2024	-1408	-1741	-1733
157	-2038	-1456	-1764	-1760
158	-2059	-1489	-1791	-1787
159	-2082	-1518	-1818	-1814
160	-2108	-1546	-1846	-1841
161	-2125	-1628	-1876	-1876
162	-2152	-1699	-1905	-1910
163	-2177	-1752	-1936	-1944
164	-2213	-1783	-1973	-1979
165	-2260	-1802	-2005	-2013
166	-2290	-1858	-2055	-2060
167	-2320	-1896	-2104	-2107
168	-2362	-1924	-2156	-2153
169	-2422	-1947	-2204	-2200
170	-2493	-1969	-2248	-2247
171	-2505	-2061	-2297	-2294
172	-2519	-2147	-2345	-2341
173	-2534	-2215	-2393	-2387
174	-2551	-2268	-2444	-2434
175	-2585	-2302	-2489	-2481
Floating mat deposits
0	2021.8	2021.8	2021.8	2021.8
1	2019.5	2021.6	2021.1	2020.9
2	2018.6	2021.3	2020.3	2020.2
3	2017.7	2020.8	2019.6	2019.5
4	2016.6	2020	2018.8	2018.7
5	2015.6	2019	2017.8	2017.7
6	2010.1	2017.9	2015.5	2015.1
7	2005	2016.3	2012.2	2011.8
8	2000.8	2013.9	2008.6	2008.2
9	1997	2010.7	2004.5	2004.4
10	1993.5	2005.8	2000.7	2000.5
11	1987.9	2000.9	1994.6	1994.6
12	1985.3	1993.8	1988.9	1989
13	1978.5	1987.2	1983.5	1983.3
14	1968	1984.7	1978.6	1978.2
15	1960.3	1982.2	1974	1973.2
16	1953.8	1979.5	1969.3	1968.5
17	1946.8	1976.7	1964.9	1964
18	1940.9	1972.9	1960.5	1959.5
19	1934.7	1969.2	1955.7	1954.9
20	1928.7	1965.8	1950.9	1950.2
21	1922	1963	1945.9	1945
22	1916.6	1959.3	1940.7	1939.9
23	1911.1	1955.6	1935.8	1934.9
24	1904.9	1951.1	1930.4	1929.8
25	1899.4	1946.9	1925.5	1924.8
26	1892.9	1943.2	1920.5	1919.9
27	1886.7	1939.8	1915.7	1915
28	1881.9	1934.9	1911	1910.2
29	1876.7	1931.3	1906.1	1905.5
30	1872.1	1928	1901.2	1900.8
31	1865.5	1924.1	1896.4	1896.1
32	1860.9	1921.5	1891.7	1891.4
33	1856.1	1917.7	1887.1	1886.7
34	1851	1913.3	1882.5	1882
35	1846.3	1909.8	1877.7	1877.3
36	1840.1	1906.6	1873.3	1872.7
37	1835.3	1901.9	1868.5	1868.3
38	1829	1898.1	1864.4	1863.9
39	1823.9	1894.3	1860	1859.3
40	1818.6	1890.2	1855.4	1854.8
41	1812.5	1885.9	1851	1850.2
42	1807.3	1882.4	1846.1	1845.5
43	1802.1	1878.1	1841.1	1840.9
44	1796.6	1873.5	1836.5	1836.3
45	1792	1869.2	1832	1831.6
46	1787.7	1864.8	1827.5	1826.9
47	1782.2	1860.6	1823.4	1822.5
48	1776.7	1856.5	1818.8	1817.9
49	1771.2	1853.2	1814.2	1813.4
50	1767.3	1849.8	1809.6	1808.9

## Sheet: TableS2
Table S2. Loss on ignition and peat humification (as light absorbance of alkali extract) of the peat deposits in the Gorenki mire
Top sampling depth, cm	Bottom sampling depth, cm	Loss on ignition, %	Light absorbance
Undisturbed deposits
6	8	80.456	NA
8	10	87.3479	0.265
10	12	84.6847	NA
12	14	89.0173	NA
14	16	91.658	0.259
16	18	82.5806	NA
18	20	94.8864	0.419
20	22	93.1624	NA
22	24	88.1686	NA
24	26	90.9206	0.447
26	28	97.2222	NA
28	30	96.0557	0.384
32	34	96.5695	0.472
36	38	96.4674	0.426
40	42	96.9112	0.44
42	44	97.2222	NA
44	46	NA	0.506
46	48	97.561	NA
48	50	97.8622	0.532
50	52	96.712	NA
52	54	96.9158	NA
54	56	96.7033	0.354
56	58	94.856	0.442
58	60	97.2851	NA
60	62	97.657	0.301
62	64	97.8218	NA
64	66	98.4716	0.315
66	68	96.8985	NA
68	70	96.6667	0.294
70	72	97.963	NA
72	74	97.3832	0.329
74	76	97.3856	NA
76	78	97.6744	0.264
80	82	97.7117	0.301
84	86	97.166	0.457
88	90	96.8447	0.508
90	92	NA	0.464
92	94	98.6346	NA
94	96	97.286	NA
96	98	98.5277	0.284
98	100	95.6522	NA
100	102	NA	0.404
102	104	96.6521	NA
104	106	97.5454	0.468
106	108	97.6048	NA
108	110		0.378
110	112	98.1191	NA
112	114	98.3813	0.477
114	116	97.193	NA
116	118	96.1538	0.478
118	120	97.6932	NA
120	122	97.2921	0.559
122	124	98.262	NA
124	126		0.555
126	128	97.4891	0.595
128	130	96.4093	0.538
130	132	96.875	NA
132	134	97.7465	0.485
134	136	98.472	NA
136	138	97.5221	0.468
138	140	98.1132	NA
140	142	98.2424	0.398
142	144	96.875	NA
144	146	97.0149	0.397
148	150	97.561	0.304
150	152	97.3783	NA
152	154	93.9614	0.497
154	156	97.2414	NA
156	158	98.6755	0.507
158	160	95.5516	NA
160	162	95.9075	0.543
162	164	96.9466	NA
164	166	NA	0.504
168	170	92.511	0.468
170	172	92.9293	NA
172	174	92.9005	0.488
174	176	65.5369	NA
176	178	6.61347	0.183
178	180	NA	0.017
184	186	3.19475	NA
190	192	2.27217	NA
Floating mat deposits
0	5	94.9813	NA
5	10	88.9444	NA
10	12	89.6231	NA
12	14	90.0797	NA
14	16	81.7506	NA
16	18	74.6303	NA
18	20	70.4538	NA
20	22	89.0902	NA
22	24	91.553	NA
24	26	93.525	NA
26	28	94.7588	NA
28	30	93.3847	NA
30	32	93.8378	NA
32	34	92.995	NA
34	36	92.3748	NA
36	38	92.2281	NA
38	40	90.8544	NA
40	42	90.5929	NA
42	44	92.9992	NA
44	46	94.5436	NA
46	48	93.6781	NA
48	50	93.7798	NA

## Sheet: TableS3
Table S3. Plant macrofossil composition (%) of the peat deposits in the Gorenki mire
Undisturbed deposits
Mean sampling depth, cm	Pinus sylvestris	Alnus	Salix	Carex sp.	Carex vesicaria	Carex lasiocarpa	Carex rostrata	Carex appropinquata	Carex acuta	Carex stricta	Carex limosa	Carex cespetosa	Comarum palustre	Eriophorum	Menyanthes trifoliata	Phragmites australis	Scirpus	Other herbs	Sphagnum sp.	Sphagnum palustre	Sphagnum subsecundum	Sphagnum flexuosum
3	90	0	0	0	0	0	0	0	0	0	0	0	0	5	0	0	0	0	5	0	0	0
7	90	0	0	0	0	0	0	0	0	0	0	0	0	5	0	0	0	0	5	0	0	0
11	87	0	0	5	0	0	0	0	0	0	0	0	0	5	0	0	0	3	0	0	0	0
15	90	0	2	3	0	0	0	0	0	0	0	0	0	2	0	0	0	3	0	0	0	0
19	88	0	2	5	0	0	0	0	0	0	0	0	0	5	0	0	0	0	0	0	0	0
27	5	0	2	10	20	37	3	0	5	0	0	0	0	3	0	0	0	10	5	0	0	0
31	2	0	0	10	20	35	20	0	6	0	0	0	0	0	0	0	0	5	2	0	0	0
35	5	0	0	0	0	5	30	20	35	0	0	0	0	0	0	0	0	0	5	0	0	0
39	10	0	0	0	0	0	40	20	20	0	0	0	0	0	0	0	0	0	10	0	0	0
43	0	0	0	0	0	0	40	15	35	0	0	0	0	0	0	5	0	0	5	0	0	0
47	5	0	0	0	0	35	35	0	20	0	0	0	0	0	0	0	0	0	5	0	0	0
51	5	0	0	0	0	35	35	0	15	0	0	0	0	5	0	0	0	0	5	0	0	0
55	8	0	0	0	0	8	38	0	15	0	15	0	0	0	0	8	0	0	8	0	0	0
59	5	0	0	0	0	0	48	0	5	0	27	0	0	5	0	5	0	0	5	0	0	0
63	0	0	0	0	0	0	45	0	5	0	40	0	0	5	0	0	0	0	5	0	0	0
67	5	0	0	0	0	0	35	0	5	0	45	0	0	0	0	5	0	0	5	0	0	0
71	0	0	0	0	5	35	15	0	5	0	0	0	15	0	0	0	10	10	5	0	0	0
75	5	0	0	5	10	30	10	0	10	0	0	0	5	0	0	0	10	10	5	0	0	0
79	5	0	0	10	10	25	10	0	10	0	0	0	5	0	0	0	10	10	5	0	0	0
83	5	0	0	10	10	25	20	0	10	0	0	0	0	0	0	0	5	10	5	0	0	0
87	2	0	0	10	5	40	18	0	0	0	0	0	0	0	0	0	10	10	5	0	0	0
91	2	0	0	5	5	45	18	0	0	0	0	0	0	0	0	0	10	10	5	0	0	0
95	0	0	0	5	15	25	10	0	5	0	0	0	5	0	0	0	5	5	5	5	15	0
99	5	0	0	10	0	0	0	0	0	0	0	0	0	0	0	0	5	10	15	25	20	10
103	0	0	0	10	25	15	10	0	5	0	0	0	0	0	0	0	10	10	5	5	5	0
107	0	0	0	10	25	15	10	0	5	0	0	0	0	0	0	0	10	10	5	5	5	0
111	0	0	0	10	25	20	20	0	0	0	0	0	0	0	0	0	5	5	5	5	5	0
115	0	0	0	10	20	35	15	0	0	0	0	0	0	0	0	0	5	10	5	0	0	0
119	2	0	0	10	20	37	15	0	0	0	0	0	0	0	0	0	5	10	1	0	0	0
123	1	0	0	10	8	35	25	0	0	0	0	10	0	0	0	0	0	10	1	0	0	0
127	0	0	1	5	10	35	10	0	5	0	0	23	0	0	0	0	0	10	1	0	0	0
131	1	0	1	10	15	25	15	5	0	0	0	15	0	0	0	0	0	10	3	0	0	0
133	1	0	2	10	15	25	15	0	0	0	0	15	0	0	0	0	5	10	2	0	0	0
135	2	0	1	10	10	25	10	0	0	0	5	15	0	0	0	0	10	10	2	0	0	0
137	1	0	0	10	5	35	15	0	0	7	0	10	0	0	0	0	5	10	2	0	0	0
139	2	0	0	10	5	15	15	0	0	5	0	8	0	0	0	0	25	10	5	0	0	0
141	1	0	0	10	5	20	25	0	0	5	0	10	4	0	0	0	5	10	5	0	0	0
143	3	1	2	10	5	20	24	0	5	0	0	10	0	0	0	0	5	10	5	0	0	0
147	1	0	1	10	5	26	21	0	8	0	0	10	0	0	0	0	5	10	3	0	0	0
151	1	0	1	5	5	25	20	0	5	0	0	10	0	0	0	0	13	10	5	0	0	0
155	3	0	2	10	5	25	25	0	5	0	0	10	0	0	0	5	10	0	0	0	0	0
159	5	0	0	5	10	25	10	0	5	0	0	5	0	0	0	0	30	5	0	0	0	0
163	5	0	0	10	10	30	10	0	0	0	0	15	0	0	0	0	20	0	0	0	0	0
167	1	0	0	10	14	25	10	0	0	0	0	10	0	0	0	0	20	9	1	0	0	0
171	0	0	0	10	15	15	15	0	0	0	0	15	0	0	9	0	10	10	1	0	0	0
175	0	0	0	10	5	15	15	0	0	0	0	25	0	0	5	0	15	10	0	0	0	0
179	0	0	0	10	15	10	15	0	0	0	0	20	0	0	5	0	15	10	0	0	0	0
Floating mat deposits
Mean sampling depth, cm	Pinus sp. - periderm	Salix sp.	Carex cespitosa	Carex canacens	Carex lasiocarpa	Carex limosa	Carex omskiana	Carex rostrata	Carex vesicaria	Cyperaceae - rootlets	Comarum palustre	Eriophorum	Menyanthes trifoliata	Scirpus	Phragmites australis	Other herbs	Sphagnum sp.	Spagnum (aquatifolia)	Sphagnum balticum	Sphagnum (cuspidata)	Sphagnum cuspidatum	Sphagnum fallax	Sphagnum flexuosum	Sphagnum divinum	Sphagnum majus	Sphagnum obtusum	Spagnum (palustria)	Spagnum (subsecunda)	Green mosses
2	0	0	0	0	0	0	0	0	0	0	0	0	0	0	0	0	10	0	10	0	0	80	0	0	0	0	0	0	0
5	4	0	0	0	0	0	0	0	0	2	0	10	0	0	0	3	10	0	20	0	0	40	0	10	0	0	0	0	1
9	2	1	5	1	0	0	0	0	0	2	1	2	0	0	0	6	10	0	20	0	0	30	0	0	20	0	0	0	0
13	7	2	41	10	0	0	0	10	10	0	0	10	0	0	0	5	5	0	0	0	0	0	0	0	0	0	0	0	0
17	10	1	2	1	0	0	0	1	1	0	0	0	0	0	0	0	0	22	10	10	0	30	0	0	5	0	5	0	2
19	5	0	6	5	0	0	0	5	10	10	1	10	0	0	0	3	0	0	0	15	0	10	0	0	5	0	5	0	10
21	5	0	5	1	0	0	0	2	5	0	1	12	0	0	0	4	0	0	0	15	0	20	0	0	0	0	0	0	30
23	2	0	18	0	3	0	0	5	3	0	1	5	0	0	0	0	0	0	0	33	0	25	0	0	0	0	0	0	5
25	2	0	0	0	2	0	0	2	2	0	3	5	0	0	0	5	9	0	0	0	0	10	0	0	0	60	0	0	0
29	2	0	0	0	2	0	0	2	2	2	2	3	0	0	0	5	13	0	0	0	0	10	0	0	0	57	0	0	0
31	1	0	0	0	3	1	1	2	2	0	0	10	0	0	0	0	0	0	0	0	0	15	25	0	0	40	0	0	0
33	1	0	0	0	5	1	2	1	2	5	0	10	0	0	3	0	10	0	0	0	0	10	25	0	0	25	0	0	0
35	1	0	0	0	5	0	2	1	3	5	0	10	0	0	3	10	10	0	0	0	10	5	25	0	0	10	0	0	0
37	0	0	0	0	30	0	10	5	5	2	0	30	0	0	3	10	0	0	0	0	5	0	0	0	0	0	0	0	0
39	0	0	0	0	25	0	10	10	15	5	0	20	0	0	3	10	0	0	0	0	2	0	0	0	0	0	0	0	0
41	0	0	0	0	20	0	10	5	27	0	0	20	0	5	3	10	0	0	0	0	0	0	0	0	0	0	0	0	0
43	0	0	0	0	20	0	10	5	22	10	0	15	0	5	3	0	5	0	0	0	0	0	0	0	0	0	0	5	0
45	0	0	0	0	15	0	15	5	27	0	0	15	0	10	3	0	5	0	0	0	0	0	0	0	0	0	0	5	0
47	0	0	0	0	40	0	15	10	10	0	0	10	5	0	2	8	0	0	0	0	0	0	0	0	0	0	0	0	0
49	0	0	0	0	35	0	15	5	5	0	0	30	0	0	0	10	0	0	0	0	0	0	0	0	0	0	0	0	0

## Sheet: TableS4
Table S4. Pollen and spore composition (%) of the peat deposits in the Gorenki mire
Undisturbed deposits
Mean sampling depth, cm	Pinus	Picea	Betula	Alnus	Salix	Quercus	Ulmus	Tilia	Corylus	Fraxinus	Carpinus	Ericales	Poaceae (<40 µm)	Poaceae (Cerealia)	Onagraceae	Cyperaceae	Centaurea cyanus	Centaurea scabiosa	Asteraceae subf. Asteroideae	Asteraceae subf. Cichorioideae	Artemisia	Aconitum	Carduus	Ranunculus	Polygalaceae	Chenopodiaceae sensu stricto	Apiaceae	Fabaceae	Filipendula	Fagopyrum	Polygonum aviculare	Rumex	Urtica	Galium	Plantago	Comarum	Menyanthes	Sparganium	Typha	Alisma	Trees and Shrubs	Upland Herbs	Aquatic Vascular Plants	Sphagnum	Polypodiaceae	Lycopodium clavatum	Lycopodium annotinum	Aquatic Bryophytes	Terrestrial Vascular Cryptogams
3	48.2	3	37.3	4.8	0	0.6	0	0	1.2	0	0	0	1.2	0	0	0.6	0	0	0	0	1.2	0	0	0	0	0.6	1.2	0	0	0	0	0	0	0	0	0	0	0	0	0	95.2	4.8	0	8.3	0	0	0	8.3	0
7	34.3	7.2	50.4	0.8	1.3	0.4	0.4	1.3	0.8	0	0	0	0	0	0.4	0.4	0	0	0	0	0.4	0	0	0	0	1.3	0.4	0	0	0	0	0	0	0	0	0	0	0	0	0	97	3	0	7.4	0.4	0.4	0	7.4	0.8
11	68.6	15.3	10.9	0	0	0.7	0	2.2	0	0	0	0	1.5	0	0	0	0	0	0.7	0	0	0	0	0	0	0	0	0	0	0	0	0	0	0	0	0	0	0	0	0	97.8	2.2	0	10.2	0.7	2.1	0	10.2	2.8
13	40.6	7	35.7	2.9	0.4	0.8	0.8	1.2	1.2	0	0.4	1.2	1.6	0.8	0	1.6	0	0	1.2	0	0.4	0	0	0.4	0	0.4	0.4	0	0	0	0.4	0	0	0.4	0	0.4	0	0	0	0	92.2	7.8	0.4	10.8	0.8	0.4	0	10.8	1.2
15	38.9	9.6	35	1	0.7	2	0.7	0.3	0.3	0	0	1.7	1.7	0.3	0	5	0	0	1	0	1	0	0	0	0	0	0	0	0.7	0	0.3	0	0	0	0	0	0	0.7	0	0	90.1	9.9	0.7	11.4	0.3	1.3	0	11.4	1.6
17	24.1	9.4	39.1	2.4	0	2.1	0.3	0.6	0.6	0	0	1.2	2.6	1.2	0	10.6	0	0.6	0.6	0.3	1.5	0	0.3	0.3	0	0.3	0.6	0	0.9	0.3	0	0	0	0.3	0	0	0	0.3	0	0	79.7	20.3	0.3	6	0.6	0.6	0	6	1.2
19	19.3	2.4	33.5	0.8	1.6	1.2	0.4	0.8	1.6	0	0	0	3.1	0.8	0	28.3	0	0	0.4	0	3.1	0	0.4	0.4	0	0	0.8	0	0	0.8	0	0.4	0	0	0	0.4	0	0	0	0	61.4	38.6	0.4	2.2	1.1	1.9	0	2.2	3.1
21	66.4	20.3	4.3	0	0	0.4	0	0	0	0	0	0	3	0.4	0	4.7	0	0	0	0	0	0	0	0	0	0	0	0	0	0.4	0	0	0	0	0	0	0	0	0	0	91.4	8.6	0	1	0.4	17.7	0	1	18
23	23.9	9.7	27.2	2	0.4	3.9	0.4	0.8	0.2	0	0	6.1	11.6	2.6	0.2	9.7	0	0	0	0	1	0	0	0	0	0	0	0.4	0	0	0	0	0	0	0	0	0	0	0.2	0	74.6	25.4	0.2	2.9	0	0.2	0	2.9	0.2
27	43.9	20.9	17.2	4.1	0	2.4	0	1	0	0	0	0.3	1.4	1.7	0	6.1	0	0	0.3	0	0.7	0	0	0	0	0	0	0	0	0	0	0	0	0	0	0	0	0	0	0	89.9	10.1	0	8	0.7	0.3	0	8	1
29	25.8	9.2	33.3	3.9	1	4.1	1.8	1.8	1.8	0	0	0	4.1	1	0	10.6	0	0	0	0	0.4	0	0	0.2	0	0.4	0.2	0	0.2	0	0	0	0	0	0	0	0	0	0	0	82.8	17.2	0	12.3	0.2	0	0	12.3	0.2
33	26.1	41.7	16.5	2.8	0	2.8	1.4	3.2	0.9	0	0	0	0.5	0.5	0	1.8	0	0	0	0	1.8	0	0	0	0	0	0	0	0	0	0	0	0	0	0	0	0	0	0	0	95.4	4.6	0	29.4	0	0	0	29.4	0
37	9.2	24.7	23.3	4.5	0	13.4	5.5	6.2	1.4	0.3	0	0.7	1	0	0	8.6	0	0	0	0	1	0	0	0	0	0.3	0	0	0	0	0	0	0	0	0	0	0	0	0	0	89	11	0	24.2	0	0	0	24.2	0
41	13	31.2	29.5	2.6	0	8.5	2.6	3.9	0.7	0	0	0.2	2	0.2	0	5	0	0	0	0	0.4	0	0	0	0	0.2	0	0	0	0	0	0	0	0	0	0	0	0	0	0	92.2	7.8	0	12.9	0	0	0	12.9	0
45	13.4	30.2	19.1	4.7	1	12.1	2.3	5	4.4	0	0	0	1	0.3	0	4.4	0	0	0	0	1	0	0	0	0	0.7	0	0	0	0	0	0	0.3	0	0	0.3	0	0.3	0	0	92.3	7.7	0.7	3.8	1	0	0	3.8	1
49	27.8	51.8	12.2	0.4	0	2	0.8	3.5	0.8	0	0	0	0	0	0	0.4	0	0	0	0	0.4	0	0	0	0	0	0	0	0	0	0	0	0	0	0	0	0	0	0	0	99.2	0.8	0	1.5	0.4	0	0	1.5	0.4
53	8.3	41.5	24.2	2.3	1.1	6.8	3	6.8	0.4	0	0	0	0.4	0	0	3.4	0	0	0	0	1.1	0	0	0	0	0.8	0	0	0	0	0	0	0	0	0	0	0	0	0	0	94.3	5.7	0	2.6	0.7	0	0	2.6	0.7
57	27.6	56.2	5.4	0.9	0	4.2	0.6	3.3	0.6	0	0	0	0.6	0	0	0	0	0	0	0	0.6	0	0	0	0	0	0	0	0	0	0	0	0	0	0	0	0	0	0	0	98.8	1.2	0	7.9	1.5	0	0	7.9	1.5
61	11.5	21.4	23.1	4.8	1.1	15.2	4.8	6.2	2.5	0	0	0	1.4	0	0	4.8	0	0	0	0	1.4	0	0	0	0	0.8	0	0	0.6	0	0	0	0.3	0	0	0.6	0	0.3	0	0	90.7	9.3	0.8	5	0.6	0	0	5	0.6
65	21.6	45.9	7.4	1.4	0.3	6.8	1	11.1	1.7	0.3	0	0	1.4	0	0	1	0	0	0	0	0	0	0	0	0	0	0	0	0	0	0	0	0	0	0	0	0	0	0	0	97.6	2.4	0	8.3	0.7	0	0	8.3	0.7
69	12.8	17.8	35.2	3.7	0	12.3	4.6	5.5	3.2	0.5	0	0	0	0	0	2.7	0	0	0	0	1.4	0	0	0	0	0	0.5	0	0	0	0	0	0	0	0	0	0	0	0	0	95.4	4.6	0	6.4	0	0	0	6.4	0
73	9.2	21	42.1	10.3	0	5.6	2.1	4.1	2.1	0	0	0	0	0	0	1.5	0	0	0	0	2.1	0	0	0	0	0	0	0	0	0	0	0	0	0	0	0	0	0	0	0	96.4	3.6	0	21.7	0	0	0	21.7	0
77	17.9	9.4	42.6	3.6	1.3	4.9	0.4	1.3	0.9	0	0	1.3	4	0	0	9	0.4	0	0	0	0.9	0	0	0.4	0	0.9	0.4	0	0	0	0	0	0	0	0	0	0	0	0	0	83.9	16.1	0	5.5	0.4	0.4	0	5.5	0.9
79	12.8	31.6	23.8	4.6	0.4	12.1	1.8	4.3	3.5	0	0	0	0	0	0	4.3	0	0	0	0	0.4	0	0	0	0.4	0.4	0	0	0	0	0	0	0	0	0	0	0	1.7	0	0	94.7	5.3	1.7	0.3	0.7	0	0	0.3	0.7
81	16.3	73.6	5.3	1.4	0	1.4	0	0	0	0	0	0	0	0	0	1.9	0	0	0	0	0	0	0	0	0	0	0	0	0	0	0	0	0	0	0	0	0	0	0	0	98.1	1.9	0	1.9	0.5	0.5	0	1.9	1
85	5.3	34.4	20.2	5.3	0.4	13.4	6.9	7.3	1.6	0	0	0	0.4	0	0	3.6	0	0	0	0	0.8	0	0	0	0	0.4	0	0	0	0	0	0	0	0	0	0	0	0	0	0	94.7	5.3	0	3.5	0	0	0	3.5	0
89	13.2	69.6	2.8	1.2	0	5.2	1.2	4	0.4	0	0	0	0.8	0	0	0	0	0	0	0	0.8	0	0	0	0	0.4	0	0	0.4	0	0	0	0	0	0	0	0	0	0	0	97.6	2.4	0	1.6	0	0.4	0	1.6	0.4
93	6.9	35.9	18.5	3.9	0	10.4	2.7	8.5	2.7	0.4	0	0	0.8	0	0	6.9	0	0	0.4	0	1.9	0	0	0	0	0	0	0	0	0	0	0	0	0	0	0	0	0	0	0	90	10	0	5.8	0	0	0	5.8	0
97	20.1	56.3	10.1	2	0.5	3	1	3	2	0	0	0	1	0	0	0	0	0	0	0	0.5	0	0	0	0	0	0	0	0	0	0	0	0.5	0	0	0	0.5	0	0	0	98	2	0.5	1	0	0	0	1	0
99	23.6	10.4	30.2	1.4	0.9	6.1	1.9	2.4	2.8	0	0	1.9	4.2	0.5	0.5	7.5	0	0	0.5	0	2.8	0	0	0	0	0.5	1.4	0	0	0.5	0	0	0	0	0	0	0	0	0	0	81.6	18.4	0	2.3	0	0.3	0	2.3	0.3
101	8.4	48	16.2	3	0	8.4	6.1	4.1	2	0	0	0	0	0	0	2.4	0	0	0	0	1	0	0	0	0	0.3	0	0	0	0	0	0	0	0	0	0.3	0	0	0	0	96.3	3.7	0.3	5.1	0	0	0.4	5.1	0.4
105	16.1	44.4	10.8	4.5	0	11.2	1.8	7.2	1.8	0.4	0	0	0.9	0	0	0	0	0	0	0	0.4	0	0	0	0	0.4	0	0	0	0	0	0	0	0	0	0	0	0	0	0	98.2	1.8	0	0	0	0	0	0	0
109	6.9	43.1	14.4	2.8	0	9.7	6.5	6.9	3.2	0.5	0	0	0.5	0	0	2.8	0	0	0	0	2.3	0.5	0	0	0	0	0	0	0	0	0	0	0	0	0	0	0	0	0	0	94	6	0	5.4	0	0	0	5.4	0
113	18	51	13.4	6.7	0	4.1	1	0.5	2.1	0.5	0	0	0	0	0	2.1	0	0	0	0	0	0	0	0	0	0.5	0	0	0	0	0	0	0	0	0	0	0	0	0	0	97.4	2.6	0	1.5	0	0	0	1.5	0
117	6.7	15.6	42.2	7	0	7.8	7.4	2.2	3.7	0	0	0	0.7	0.4	0	3.7	0	0	0	0	1.5	0.4	0	0	0	0	0	0	0	0	0	0.4	0.4	0	0	0	0	0	0	0	92.6	7.4	0	1.4	0.5	0	0	1.4	0.5
121	13.6	51.5	12.1	2.9	0	9.2	3.9	2.4	2.4	0	0	0	0.5	0	0	0.5	0	0	0	0	1	0	0	0	0	0	0	0	0	0	0	0	0	0	0	0	0	0	0	0	98.1	1.9	0	2	0	0	0	2	0
129	18.4	50.2	10.4	1.5	0	7	3	7	0.5	0	0	0	0	0	0	0.5	0	0	0	0	1	0	0	0	0	0	0	0	0.5	0	0	0	0	0	0	0	0	0	0	0	98	2	0	33.5	1.1	0.4	0	33.5	1.5
133	7.8	30	22.6	9.3	0	10.1	1.9	9.3	2.7	0	0	0	1.6	0	0	2.7	0	0	0	0	0.8	0	0	0	0	0.4	0.4	0	0	0	0	0	0	0	0.4	0	0	0.4	0	0	93.8	6.2	0.4	2.9	0	0	0	2.9	0
137	12.9	61.4	6.9	3	0	2.5	3	4.5	4	0	0	0	1	0	0	0.5	0	0	0	0	0.5	0	0	0	0	0	0	0	0	0	0	0	0	0	0	0	0	0	0	0.5	98	2	0.5	2	0	0	0.3	2	0.3
141	12.4	8.4	23.1	11.3	1.4	14.2	5.8	4.9	4	0.3	0	0	2	0	0	11.6	0	0	0	0	0	0	0	0	0	0.6	0	0	0	0	0	0	0	0	0	0.3	0	0	0	0	85.8	14.2	0.3	1.8	0.6	0	0	1.8	0.6
145	3.7	9.1	22	7.3	0	29.3	7.3	7.9	2.4	0	0	0	0.6	0	0	9.1	0	0	0	0	1.2	0	0	0	0	0	0	0	0	0	0	0	0	0	0	0	0	0	0	0	89	11	0	0.3	0.3	0	0	0.3	0.3
149	7.2	5.5	21.6	4.1	0.7	23	5.5	8.2	6.2	0	0	0	1.4	0	0	13.1	0	0	0	0.3	2.7	0	0	0	0	0.3	0	0	0	0	0	0	0	0	0	0	0	0	0	0	82.1	17.9	0	19	0	0	1.1	19	1.1
153	25.4	31.1	15.8	7.9	0	7.3	2.3	4.5	2.8	0	0	0	0.6	0	0	0.6	0	0	0	0	1.7	0	0	0	0	0	0	0	0	0	0	0	0	0	0	0	0	0	0	0	97.2	2.8	0	2.2	0.8	0	0	2.2	0.8
159	5.3	11.9	15.7	7.6	0.3	11.6	10.9	4.3	10.1	0	0	0	6.8	0	0	12.4	0	0	0	0	0.5	0	0	0	0	0	2.5	0	0	0	0	0	0	0	0	0.8	0	0	0	0	77.7	22.3	0.8	0	1.1	0	0	0	1.1
161	11.7	13.3	8	15.4	0	13.8	9.6	8	8.5	0	0	0	1.6	0	0	6.9	0	0	0	0	3.2	0	0	0	0	0	0	0	0	0	0	0	0	0	0	0	0	0	0	0	88.3	11.7	0	0	0	0	0	0	0
164	3.9	7.2	16.7	10.8	0	12.1	11.4	12.4	5.6	0	0	0	0.3	0	0	18	0	0	0	0	1	0	0	0	0	0.3	0	0	0	0	0	0	0.3	0	0	0.3	0	0	0	0	80.1	19.9	0.3	10.9	1.4	0	0	10.9	1.4
169	42.1	22.8	8.3	3.4	0	11	4.8	2.8	2.8	0	0	0	2.1	0	0	0	0	0	0	0	0	0	0	0	0	0	0	0	0	0	0	0	0	0	0	0	0	0	0	0	97.9	2.1	0	2	0.3	0	0	2	0.3
173	2.5	3	18.4	8.3	1	20.7	8.1	8.1	8.1	0	0	0	4	0	0	16.4	0	0	0	0	1	0	0	0	0	0.3	0	0	0	0	0	0	0	0	0	0	0	0	0	0	78.3	21.7	0	1.3	3.2	6.8	0	1.3	10
177	4.3	1.4	52	6.8	0	6.1	2.9	13.3	5.7	0	0	0	2.5	0	0	2.9	0	0	0	0	0.7	0	0	0	0	0.7	0.7	0	0	0	0	0	0	0	0	0	0	0.4	0	0	92.5	7.5	0.4	1.3	3.2	6.7	0	1.3	10
Floating mat deposits
Mean sampling depth, cm	Pinus	Picea	Betula	Alnus	Ulmus	Quercus	Tilia	Corylus	Ericaceae	Polygonum aviculare	Achillea-type	Ranunculaceae undiff.	Fagopyrum	Poaceae (<40 µm)	Poaceae (Cerealia)	Chenopodiaceae sensu stricto	Ambrosia	Artemisia	Asteraceae subf. Asteroideae	Asteraceae subf. Cichorioideae	Caryophyllaceae	Apiaceae	Cyperaceae	Cannabis sativa	Brassicaceae	Trees and Shrubs (%)	Upland Herbs (%)	Pollen Sum (count)	Sphagnum	Lycopodium clavatum	Polypodiaceae	Aquatic Bryophytes
0	74.1	3.5	11.4	0.6	0	0.6	0.3	0.3	0	0	0	0	0	2.5	0.6	1.6	2.2	1.6	0	0	0	0	0.6	0	0	90.9	9.1	42.9	0	0	42.9	0
2.5	33	6.2	50.2	2.6	0	0.7	0	2.6	0	0.7	0	0.4	0	0.4	1.1	0.7	0	1.1	0	0	0	0.4	0	0	0	95.2	4.8	11.1	0	0	11.1	0
7.5	24.5	3.2	61.3	2.4	0	1.6	0	2	0	0	0	0	0	2.4	0	1.2	0	1.6	0	0	0	0	0	0	0	94.9	5.1	20.7	0	0	20.7	0
12.5	25.4	3.9	39	2.4	0	1	0.5	5.4	3.9	0	0	0	0	4.4	3.4	2	0	2	0	0	0.5	0	5.9	0	0.5	81.5	18.5	35.3	0	0	35.3	0
17.5	36.7	3.4	34.8	1.9	0	1.4	0	1.9	3.9	0.5	0	0	0	5.8	1.9	0	0	3.4	0	0	0	0	4.3	0	0	84.1	15.9	9.2	0	0	9.2	0
22.5	22.3	2.3	28.2	1.3	0	0.3	0.3	0.7	30.6	0	0	0	0.3	4.7	3	0	0	1.7	0	0	0	0	3.7	0	0.7	86	14	5.3	0	0	5.3	0
27.5	16.6	4.1	45	1.2	0	0	0	4.1	3.6	0	0.6	1.8	0	3.6	3	0	0	5.3	0.6	0	0	0	9.5	1.2	0	74.6	25.4	25.6	0	0	25.6	0
32.5	17.9	3.7	30.9	3.1	1.2	0	0	8	4.3	0	0	0	0	14.2	6.2	0	0	3.7	0	0	0	0.6	6.2	0	0	69.1	30.9	24.5	0	0.6	24.5	0.6
37.5	22.7	3	35.7	9.3	0	2.2	1.9	3.7	4.1	0	0	0	0	5.2	3.3	0	0	3.3	0	1.1	0	1.5	3	0	0	82.5	17.5	8.3	0	2.9	8.3	2.9
47.5	29.3	3.8	34.1	4.7	0.9	0.6	0	6.6	3.8	1.3	0	0	0	3.5	3.8	0	0	1.3	0	0	0	0	6.3	0	0	83.9	16.1	6.5	0	8.6	6.5	8.6
52.5	4.8	1	44.8	6.2	2.9	4.3	27.1	5.2	0	0	0	0	0	2.4	0	0	0	0	0	0	0	0	1.4	0	0	96.2	3.8	7.9	12	5.4	7.9	5.4

## Sheet: TableS5
Table S5. Testate amoebae composition (%) of the floating mat deposits in the Gorenki mire
Mean sampling depth, cm	Alabasta militaris	Arcella catinus	Archerella flavum	Assulina muscorum	Assulina seminulum	Centropyxis aculeata	Corythion dubium	Cryptodifflugia oviformis	Cryptodifflugia oviformis fusca	Cyclopyxis eurystoma	Centropyxis sylvatica	Euglypha ciliata	Euglypha ciliata glabra	Euglypha compressa	Euglypha cristata	Euglypha cristata decora	Euglypha filifera	Euglypha laevis	Euglypha rotunda	Euglypha strigosa	Euglypha tuberculata	Hyalosphenia elegans	Hyalosphenia papilio	Nebela tincta	Physochila griseola	Physochila tenella	Placocista lens	Tracheuglypha dentata	Trigonopyxis arcula	Trinema complanatum	Trinema enchelys	Trinema galeata	Trinema lineare
3	0.649351	0.649351	2.5974	31.8182	5.84416	3.24675	0	0	0	9.09091	0	2.5974	0	0	0	0	0	7.79221	0	4.54545	0	1.2987	23.3766	1.2987	0	0	1.2987	0	0	1.2987	0	0	2.5974
8.5	0.657895	1.31579	1.31579	15.7895	1.31579	5.92105	1.31579	0	0	13.1579	0	1.31579	0	0	0	2.63158	0	0	1.31579	3.94737	0	9.86842	30.9211	1.31579	0	0	3.94737	0	0	1.31579	0	0	2.63158
12.5	1.3245	0.662252	0	1.3245	0	1.3245	1.3245	2.64901	0	30.4636	1.3245	0	1.3245	0	0	0.662252	0	1.3245	1.3245	1.3245	0.662252	0	0	0.662252	0	0	2.64901	1.3245	0	11.2583	3.97351	0.662252	32.4503
17	0	0.662252	0	2.64901	0.662252	0.662252	0.662252	3.97351	0.662252	17.8808	15.894	0	0	0	0	2.64901	2.64901	0.662252	0	1.98675	0	1.3245	12.5828	0.662252	0	0	0.662252	0.662252	0	7.94702	2.64901	4.63576	17.2185
21	0.662252	7.94702	0.662252	1.3245	0	2.64901	0.662252	4.63576	1.3245	6.62252	9.93377	0	0	0	0	2.64901	0	0	0	0	0	0	10.596	1.3245	1.3245	0.662252	0.662252	0	1.3245	10.596	2.64901	7.94702	23.8411
25	0	2.64901	4.63576	1.98675	0	14.5695	0	4.63576	0	16.5563	1.3245	0	0	1.3245	3.97351	0	0	1.3245	0	0	0	0	11.9205	1.3245	0	0	0	0.662252	0	13.245	1.3245	1.3245	17.2185
29	0	2.66667	1.33333	4	0	0	0.666667	2.66667	0	8	10	0	0.666667	0	6.66667	0	1.33333	1.33333	0	0	0	0	5.33333	0	0	0	0	0	0	26	4.66667	0	24.6667

## Sheet: TableS6
Table S6. Macrocharcoal data for the undisturbed peat deposits of the Gorinki mire
Upper sampling depth, cm	Bottom sampling depth, cm	Age of the upper sampling depth, BCE/CE	Age of the bottom sampling depth, BCE/CE	Sample volume, cm3	Charcoal counts, piecies
7	8	1972	1962	1	68
8	9	1962	1953	1	233
9	10	1953	1943	1	191
10	11	1943	1937	1	163
11	12	1937	1929	1	219
12	13	1929	1920	1	287
13	14	1920	1911	1	12
14	15	1911	1902	1	18
15	16	1902	1895	1	2
16	17	1895	1888	1	NA
17	18	1888	1881	1	0
18	19	1881	1874	1	0
19	20	1874	1866	1	4
20	21	1866	1862	1	1
21	22	1862	1859	1	6
22	23	1859	1856	1	1
23	24	1856	1853	1	9
24	25	1853	1849	1	2
25	26	1849	1813	1	26
26	27	1813	1778	1	NA
27	28	1778	1743	1	1
28	29	1743	1708	1	2
29	30	1708	1673	1	4
30	31	1673	1628	1	1
31	32	1628	1581	1	8
32	33	1581	1538	1	2
33	34	1538	1496	1	NA
34	35	1496	1459	1	NA
35	36	1459	1418	1	2
36	37	1418	1379	1	3
37	38	1379	1329	1	2
38	39	1329	1285	1	3
39	40	1285	1242	1	0
40	41	1242	1201	1	1
41	42	1201	1157	1	0
42	43	1157	1110	1	NA
43	44	1110	1061	1	1
44	45	1061	1017	1	6
45	46	1017	982	1	3
46	47	982	947	1	13
47	48	947	911	1	4
48	49	911	873	1	0
49	50	873	834	1	1
50	51	834	812	1	3
51	52	812	788	1	43
52	53	788	762	1	4
53	54	762	740	1	18
54	55	740	718	1	6
55	56	718	697	1	7
56	57	697	675	1	3
57	58	675	654	1	9
58	59	654	634	1	13
59	60	634	613	1	3
60	61	613	592	1	6
61	62	592	571	1	7
62	63	571	551	1	1
63	64	551	530	1	11
64	65	530	510	1	9
65	66	510	490	1	12
66	67	490	471	1	23
67	68	471	451	1	16
68	69	451	430	1	12
69	70	430	409	1	21
70	71	409	388	1	1
71	72	388	367	1	NA
72	73	367	347	1	11
73	74	347	326	1	5
74	75	326	306	1	2
75	76	306	285	1	2
76	77	285	262	1	3
77	78	262	242	1	NA
78	79	242	219	1	2
79	80	219	200	1	9
80	81	200	178	1	31
81	82	178	157	1	7
82	83	157	135	1	1
83	84	135	115	1	0
84	85	115	93	1	2
85	86	93	71	1	4
86	87	71	49	1	0
87	88	49	27	1	NA
88	89	27	4	1	1
89	90	4	-16	1	1
90	91	-16	-36	1	NA
91	92	-36	-59	1	4
92	93	-59	-81	1	4
93	94	-81	-103	1	0
94	95	-103	-121	1	2
95	96	-121	-141	1	2
96	97	-141	-164	1	4
97	98	-164	-185	1	2
98	99	-185	-208	1	2
99	100	-208	-231	1	2
100	101	-231	-257	1	14
101	102	-257	-284	1	2
102	103	-284	-312	1	4
103	104	-312	-338	1	1
104	105	-338	-360	1	39
105	106	-360	-387	1	8
106	107	-387	-412	1	3
107	108	-412	-440	1	3
108	109	-440	-466	1	3
109	110	-466	-490	1	2
110	111	-490	-518	1	4
111	112	-518	-547	1	0
112	113	-547	-574	1	9
113	114	-574	-602	1	4
114	115	-602	-629	1	9
115	116	-629	-659	1	1
116	117	-659	-685	1	2
117	118	-685	-712	1	0
118	119	-712	-742	1	3
119	120	-742	-771	1	3
120	121	-771	-798	1	23
121	122	-798	-825	1	6
122	123	-825	-849	1	0
123	124	-849	-878	1	3
124	125	-878	-905	1	2
125	126	-905	-932	1	7
126	127	-932	-960	1	2
127	128	-960	-989	1	68
128	129	-989	-1016	1	9
129	130	-1016	-1042	1	4
130	131	-1042	-1069	1	1
131	132	-1069	-1102	1	0
132	133	-1102	-1128	1	0
133	134	-1128	-1156	1	NA
134	135	-1156	-1183	1	6
135	136	-1183	-1211	1	NA
136	137	-1211	-1237	1	1
137	138	-1237	-1264	1	9
138	139	-1264	-1289	1	6
139	140	-1289	-1316	1	6
140	141	-1316	-1344	1	2
141	142	-1344	-1371	1	1
142	143	-1371	-1400	1	0
143	144	-1400	-1428	1	0
144	145	-1428	-1455	1	1
145	146	-1455	-1478	1	3
146	147	-1478	-1502	1	4
147	148	-1502	-1531	1	9
148	149	-1531	-1559	1	4
149	150	-1559	-1587	1	0
150	151	-1587	-1612	1	2
151	152	-1612	-1637	1	8
152	153	-1637	-1664	1	3
153	154	-1664	-1689	1	2
154	155	-1689	-1717	1	1
155	156	-1717	-1741	1	4
156	157	-1741	-1764	1	0
157	158	-1764	-1791	1	12
158	159	-1791	-1818	1	3
159	160	-1818	-1846	1	5
160	161	-1846	-1876	1	0
161	162	-1876	-1905	1	12
162	163	-1905	-1936	1	1
163	164	-1936	-1973	1	3
164	165	-1973	-2005	1	0
165	166	-2005	-2055	1	1
166	167	-2055	-2104	1	0
167	168	-2104	-2156	1	0
168	169	-2156	-2204	1	7
169	170	-2204	-2248	1	3
170	171	-2248	-2297	1	45
171	172	-2297	-2345	1	4
172	173	-2345	-2393	1	2
173	174	-2393	-2444	1	13
174	175	-2444	-2489	1	68
175	176	-2489	-2500	1	148
